# Supplementary material
Source: Springer Nature journal article supplement (https://www.springermedizin.de/resource/supplementary/12888_2013_1841_MOESM4_ESM.pdf/9481460)

**Study Name**

**Effect Size  
(95% CI)**

**Weight  
%**

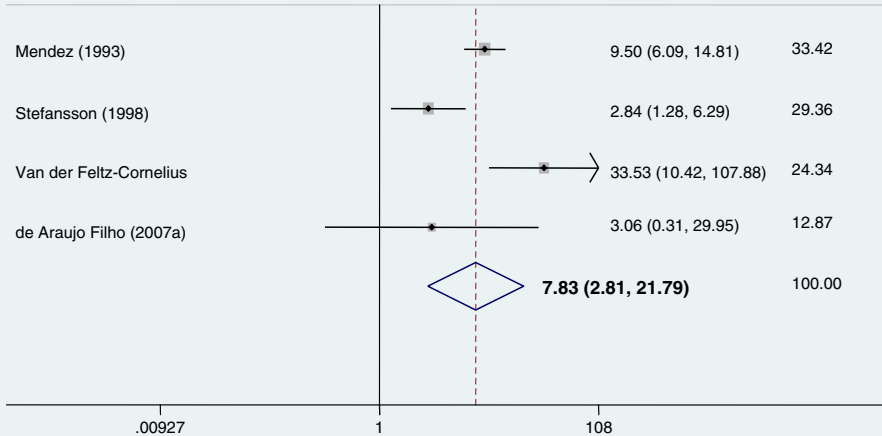

Supplement: MOESM4 [file 9481460]
